# Supplementary material for: Healthcare workers and adult patients preferences of hospital built environment. Survey in ordinary surgery and medical oncology ward at the Italian National Oncology Institute
Source: Frontiers journal article supplement (doi:10.3389/frhs.2025.1546103), 2025-04-07
Supplement: Data_Sheet_2.pdf [file Data_Sheet_2.pdf]

## SUPPLEMENTARY MATERIAL – THE QUESTIONNAIRE

|                                                                                                                                                                                                                   | Not important                                                           | Quite important | Very important |
|-------------------------------------------------------------------------------------------------------------------------------------------------------------------------------------------------------------------|-------------------------------------------------------------------------|-----------------|----------------|
| 1. Have a single room, so that privacy is fully respected.                                                                                                                                                        | <div><div>1</div><div>2</div><div>3</div><div>4</div><div>5</div></div> |                 |                |
| 2. Have a two-bed room, so they can socialise to avoid the boredom of hospitalisation, and facilitate supervision.                                                                                                | <div><div>1</div><div>2</div><div>3</div><div>4</div><div>5</div></div> |                 |                |
| 3. In the case of a double room, how important is it to have a separation between the two beds by means of a curtain.                                                                                             | <div><div>1</div><div>2</div><div>3</div><div>4</div><div>5</div></div> |                 |                |
| 4. In the case of a double room, how important is the presence of a physical separation between the two beds through a movable wall.                                                                              | <div><div>1</div><div>2</div><div>3</div><div>4</div><div>5</div></div> |                 |                |
| 5. Having a living area in the patient room so that the patient can relax without staying in bed.                                                                                                                 | <div><div>1</div><div>2</div><div>3</div><div>4</div><div>5</div></div> |                 |                |
| 6. Having the possibility for the patient to look out of the window while remaining in bed.                                                                                                                       | <div><div>1</div><div>2</div><div>3</div><div>4</div><div>5</div></div> |                 |                |
| 7. Have the windows of the in-patient rooms with a view of the surrounding nature (if the facility is located in the countryside) or of the surrounding buildings (if the facility is located in a city context). | <div><div>1</div><div>2</div><div>3</div><div>4</div><div>5</div></div> |                 |                |
| 8. Have an air-conditioning system in the room that the patient can regulate from their bed.                                                                                                                      | <div><div>1</div><div>2</div><div>3</div><div>4</div><div>5</div></div> |                 |                |
| 9. Having the possibility for the patient to adjust the room lighting from their bed.                                                                                                                             | <div><div>1</div><div>2</div><div>3</div><div>4</div><div>5</div></div> |                 |                |
| 10. Have a nurse call system accessible to the patient not only from the bed, but in every area of the room.                                                                                                      | <div><div>1</div><div>2</div><div>3</div><div>4</div><div>5</div></div> |                 |                |
| 11. Provide a second bed or a bed chair for a possible patient partner/parent.                                                                                                                                    | <div><div>1</div><div>2</div><div>3</div><div>4</div><div>5</div></div> |                 |                |
| 12. Positioning the bed in line with the door, so that it is also visible from the corridor and facilitates surveillance by the operators.                                                                        | <div><div>1</div><div>2</div><div>3</div><div>4</div><div>5</div></div> |                 |                |
| 13. Presence of a video surveillance system connected to the guardhouse.                                                                                                                                          | <div><div>1</div><div>2</div><div>3</div><div>4</div><div>5</div></div> |                 |                |

|                                                                                                                                                       |                                                                                    |
|-------------------------------------------------------------------------------------------------------------------------------------------------------|------------------------------------------------------------------------------------|
| 14. Have a private bathroom for the patient accessible from the room.                                                                                 |  |
| 15. Have a bidet in the bathroom.                                                                                                                     |  |
| 16. Room walls in soft, uniform colours.                                                                                                              |  |
| 17. Brightly coloured room walls.                                                                                                                     |  |
| 18. Room walls decorated with natural landscapes, parks, mountain views, etc.                                                                         |  |
| 19. Presence in the room of services such as Wi-Fi connection, satellite TV.                                                                          |  |
| 20. In the case of double rooms, a dedicated TV in each patient bed equipped with headphones.                                                         |  |
| 21. Presence of soundproofing in the room to exclude any noise from the ward corridor or neighbouring rooms.                                          |  |
| 22. Possibility for patients to be able to customise the furniture in their rooms by making small changes and/or enriching them with their own items. |  |
| 23. Having the nursing room at the beginning of the ward.                                                                                             |  |
| 24. Having the nursing room in the centre of the ward.                                                                                                |  |

Gentilissimo

la Direzione Medica di Presidio, in collaborazione con il Politecnico di Milano, sta avviando un'analisi su alcuni aspetti della struttura e degli ambienti ospedalieri, che si vorrebbe corrispondere al meglio alle esigenze e aspettative dei pazienti.

Il presente questionario, che è anonimo, è finalizzato a raccogliere le vs suggestioni e impressioni in modo da poter individuare le aree dove in fase di progettazione e realizzazione sarà necessario concentrare maggiormente i ns sforzi.

Per eventuali ulteriori informazioni potrà scrivere al seguente indirizzo mail: [direttore.medico@istitutotumori.mi.it](mailto:direttore.medico@istitutotumori.mi.it), buona compilazione!

Data della compilazione \_\_\_/\_\_\_/\_\_\_

Paziente |\_|

Accompagnatore |\_|

Sesso M |\_| F |\_|

Età |\_|\_|

Provincia di provenienza \_\_\_\_\_

*In una scala da 1 a 5, dove 1 corrisponde a "per nulla importante, indifferente" e 5 è "molto importante, fondamentale" la preghiamo di valutare, apponendo una X, le seguenti tematiche:*

|                                                                                                                                                                     | Per nulla<br>Importante |   | Abbastanza<br>Importante |   | Molto<br>Importante |
|---------------------------------------------------------------------------------------------------------------------------------------------------------------------|-------------------------|---|--------------------------|---|---------------------|
| 1-Avere una camera singola, in modo da avere un pieno rispetto della privacy                                                                                        | 1                       | 2 | 3                        | 4 | 5                   |
| 2-Avere una camera a due letti, in modo da poter socializzare per evitare la noia della degenza, e facilitare la vigilanza                                          | 1                       | 2 | 3                        | 4 | 5                   |
| 3-In caso di camera doppia, presenza di una separazione tra i due posti letto attraverso una tenda                                                                  | 1                       | 2 | 3                        | 4 | 5                   |
| 4-In caso di camera doppia, presenza di una separazione fisica tra i due posti letto attraverso una parete mobile                                                   | 1                       | 2 | 3                        | 4 | 5                   |
| 5-Poter disporre di una zona giorno nella camera di degenza in modo da potersi rilassare senza restare a letto                                                      | 1                       | 2 | 3                        | 4 | 5                   |
| 6-Avere la possibilità di guardare al di fuori della finestra restando a letto                                                                                      | 1                       | 2 | 3                        | 4 | 5                   |
| 7-Avere una vista sulla natura circostante (se la struttura è ubicata nel verde) o sugli edifici circostanti (se la struttura è collocata in un contesto cittadino) | 1                       | 2 | 3                        | 4 | 5                   |
| 8-Disporre di un impianto di climatizzazione della camera regolabile anche dal letto                                                                                | 1                       | 2 | 3                        | 4 | 5                   |

|                                                                                                                                                     | Per nulla<br>Importante | 1 | 2 | 3 | 4 | 5 | Abbastanza<br>Importante | Molto<br>Importante |
|-----------------------------------------------------------------------------------------------------------------------------------------------------|-------------------------|---|---|---|---|---|--------------------------|---------------------|
| 9-Avere la possibilità di regolare l'illuminazione della camera anche dal letto                                                                     |                         | 1 | 2 | 3 | 4 | 5 |                          |                     |
| 10-Disporre di un impianto di chiamata infermieri accessibile non solo dal letto, ma in ogni area della camera                                      |                         | 1 | 2 | 3 | 4 | 5 |                          |                     |
| 11-Disporre di un secondo letto oppure di una poltrona letto per un eventuale accompagnatore/parente                                                |                         | 1 | 2 | 3 | 4 | 5 |                          |                     |
| 12-Posizionamento del letto in linea con la porta, in modo che sia visibile anche dal corridoio e favorire la sorveglianza da parte degli operatori |                         | 1 | 2 | 3 | 4 | 5 |                          |                     |
| 13-Presenza di un sistema di videosorveglianza collegato alla guardiola                                                                             |                         | 1 | 2 | 3 | 4 | 5 |                          |                     |
| 14-Disporre di un bagno riservato accessibile dalla camera                                                                                          |                         | 1 | 2 | 3 | 4 | 5 |                          |                     |
| 15-Disporre, all'interno del bagno, di un bidet                                                                                                     |                         | 1 | 2 | 3 | 4 | 5 |                          |                     |
| 16-Pareti della camera di colori tenui e uniformi                                                                                                   |                         | 1 | 2 | 3 | 4 | 5 |                          |                     |
| 17-Pareti della camera di colori vivaci e accesi                                                                                                    |                         | 1 | 2 | 3 | 4 | 5 |                          |                     |
| 18-Pareti della camera decorate con paesaggi naturali, parchi, vedute montane ecc.                                                                  |                         | 1 | 2 | 3 | 4 | 5 |                          |                     |
| 19-Presenza nella stanza di servizi quali Connessione Wi-Fi, Tv Satellitare                                                                         |                         | 1 | 2 | 3 | 4 | 5 |                          |                     |
| 20-In caso di camera doppia, una TV dedicata ad ogni letto dotata di cuffie                                                                         |                         | 1 | 2 | 3 | 4 | 5 |                          |                     |
| 21-Presenza di una insonorizzazione della camera tale da escludere qualsiasi rumore dal corridoio del reparto o dalle camere vicine                 |                         | 1 | 2 | 3 | 4 | 5 |                          |                     |
| 22-Riterrebbe utile poter personalizzare l'arredo della camera attraverso piccoli spostamenti e/o arricchendolo con suppellettili proprie           |                         | 1 | 2 | 3 | 4 | 5 |                          |                     |

Eventuali commenti/suggerimenti: \_\_\_\_\_  
 \_\_\_\_\_  
 \_\_\_\_\_

**GRAZIE PER LA COLLABORAZIONE!**
